# Supplementary material
Source: PubMed Central journal article supplement (PMC1413773)

**A**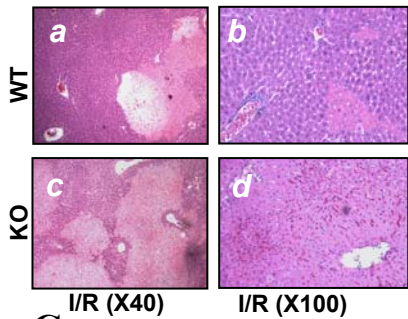**B**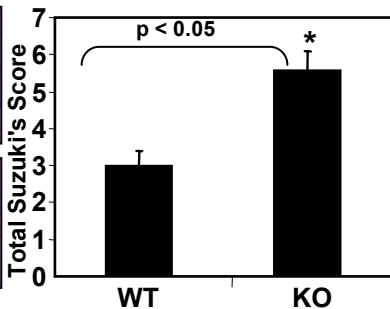**C**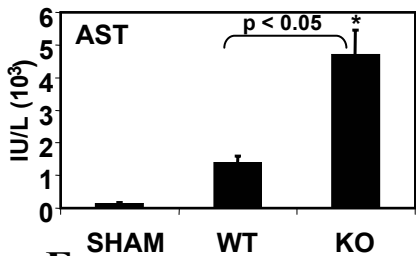**D**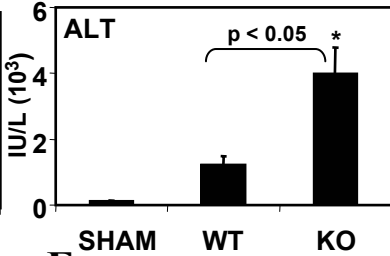**E**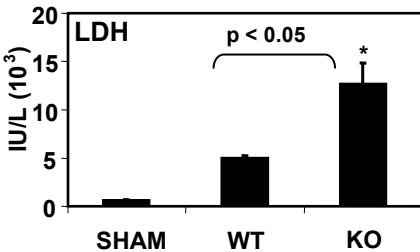**F**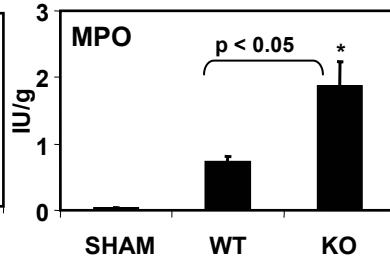

Supplement: pnas_0506854103_1.pdf [file pnas_0506854103_1.pdf]

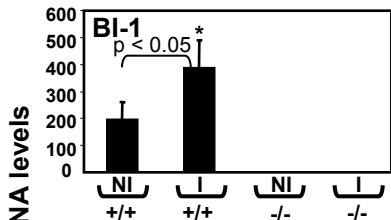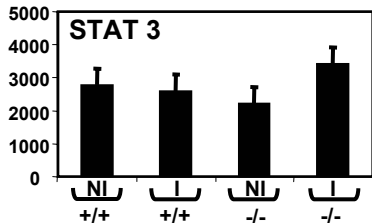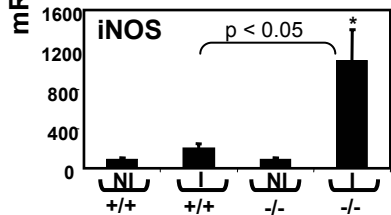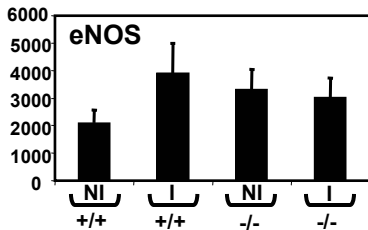

Supplement: pnas_0506854103_3.pdf [file pnas_0506854103_3.pdf]

# Protein

# RNA

## A

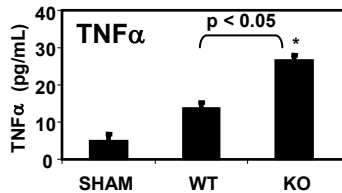

## D

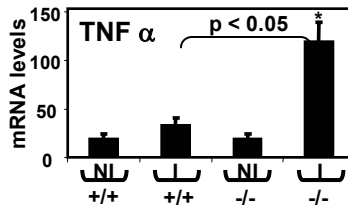

## E

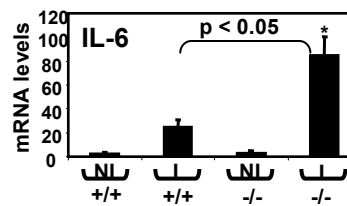

## B

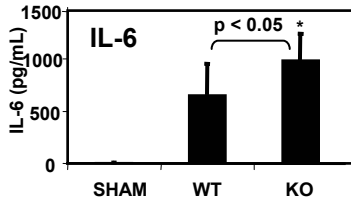

## F

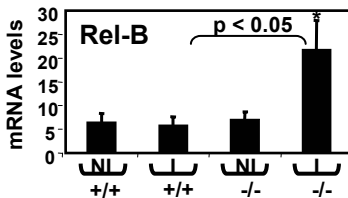

## G

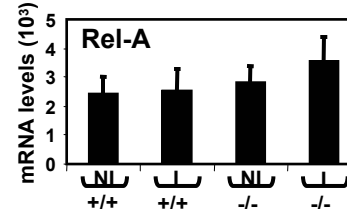

## C

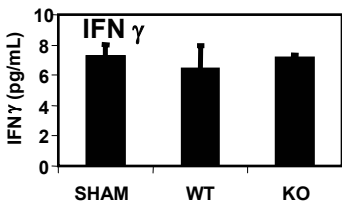

Supplement: pnas_0506854103_4.pdf [file pnas_0506854103_4.pdf]

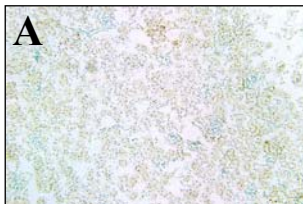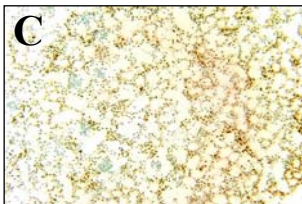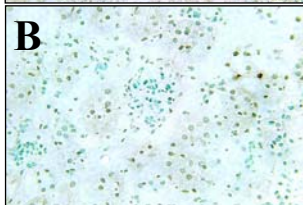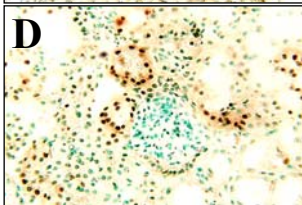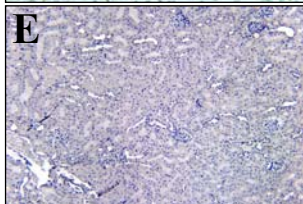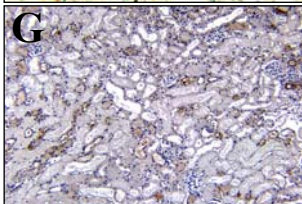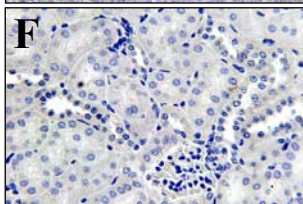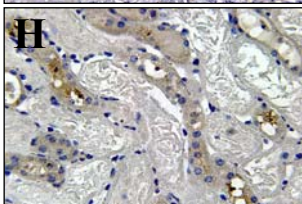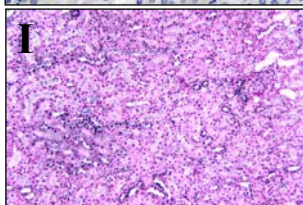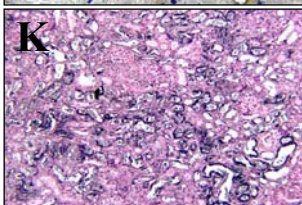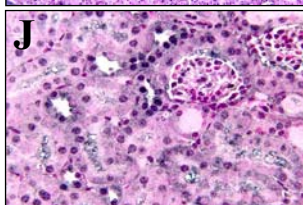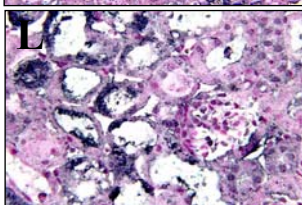

Supplement: pnas_0506854103_5.pdf [file pnas_0506854103_5.pdf]

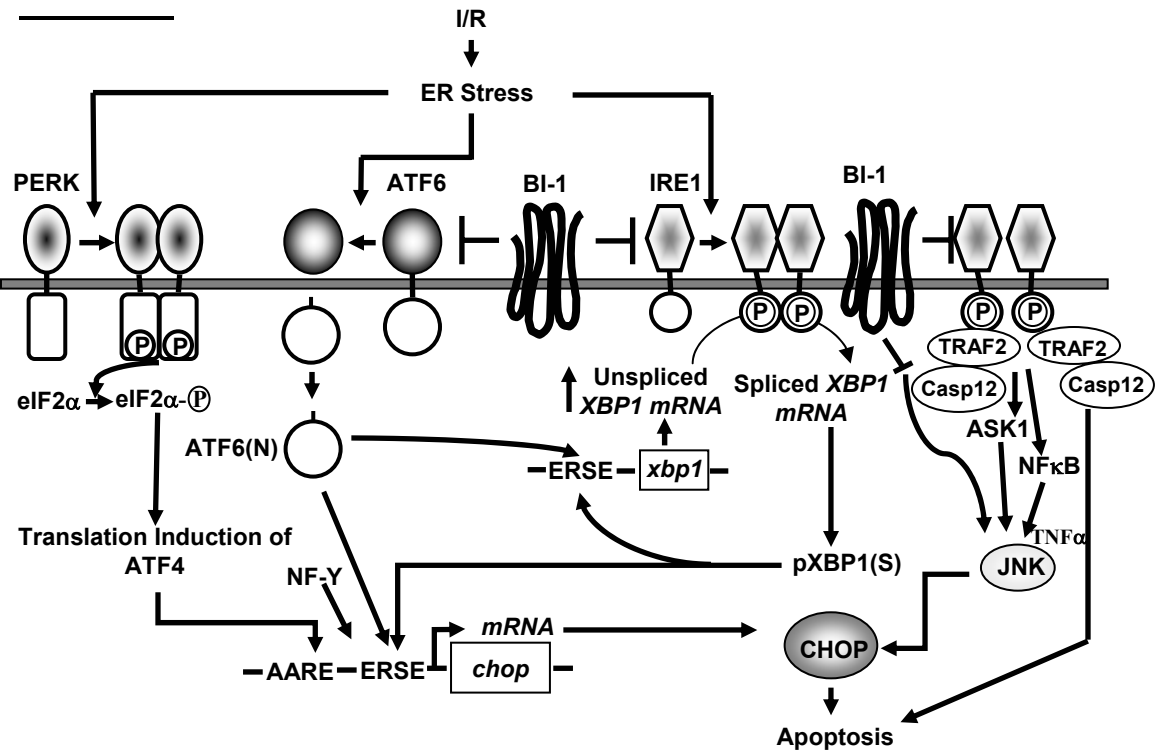

Supplement: pnas_0506854103_6.pdf [file pnas_0506854103_6.pdf]
